# Supplementary material for: Non-Coding RNAs as Prognostic Biomarkers: A miRNA Signature Specific for Aggressive Early-Stage Lung Adenocarcinomas
Source: Noncoding RNA. 2020 Dec 15;6(4):48. doi: 10.3390/ncrna6040048 (PMC7768474; doi:10.3390/ncrna6040048)
Supplement: Supplementary file 1 [file ncrna-06-00048-s001.xlsx]

## Sheet: Table_S1
Table S1. Patients and tumors characteristics according to C1/non-C1 stratification.
	TCGA-LUAD cohort	C1	non-C1	p-value
	n=515	n=201	n=314
Age [years]
Median (Q1;Q3)	66 (59;73) 1	66 (59;72) 2	66 (59;73) 3	0.71 4
Gender
Male	238 (46.2%)	111 (55.2%)	127 (40.4%)	0.0011 5
Female	277 (53.8%)	90 (44.8%)	187 (59.6%)
Smoking status
Current/former smoker	367 (71.3%)	155 (77.1%)	212 (67.5%)	0.06 5
Never smoker	63 (12.2%)	20 (10.0%)	43 (13.7%)
Missing smoking status	85 (16.5%)	26 (12.9%)	59 (18.8%)
Stage
Stage I	279 (54.2%)	94 (46.8%)	185 (58.9%)	0.0193 5
Stage II	124 (24.1%)	55 (27.4%)	69 (22.0%)
Stage III	84 (16.3%)	42 (20.9%)	42 (13.4%)
Stage IV	27 (5.2%)	9 (4.5%)	18 (5.7%)
Missing stage	1 (0.2)	1 (0.5%)	0
Percentages could not add up to 100 due to rounding; 1 19 patients with missing information on age; 2 9 patients with missing information on age; 3 10 patients with missing information on age; 4 Wilcoxon test; 5 Fisher’s exact test

## Sheet: Table_S2
Table S2A. TCGA-LUAD cohort. n = 200 miRNAs significantly regulated by DESeq2 in C1 vs. non-C1 clusters comparison.
miRNA	Fold Change C1 vs. non-C1	Wald test p-value	Wald test adjusted p-value (Benjamini-Hochberg method)
hsa-miR-584-5p	2.78033	3.23843e-43	1.23708e-40
hsa-miR-215-5p	4.99279	6.33977e-40	1.2109e-37
hsa-miR-194-5p	3.31467	1.35403e-26	1.72414e-24
hsa-miR-192-5p	3.09613	1.03996e-22	9.81043e-21
hsa-miR-196b-5p	3.15452	1.28409e-22	9.81043e-21
hsa-miR-31-3p	3.21413	2.91695e-22	1.85712e-20
hsa-miR-4709-3p	0.483917	2.31506e-21	1.26336e-19
hsa-miR-31-5p	3.14873	3.57391e-20	1.70654e-18
hsa-miR-582-3p	2.2175	5.91991e-20	2.51267e-18
hsa-miR-30d-5p	0.608792	1.25472e-17	4.79302e-16
hsa-miR-30d-3p	0.645578	7.05852e-17	2.45123e-15
hsa-miR-664a-3p	0.683835	1.14667e-15	3.65024e-14
hsa-miR-664b-3p	0.701947	5.77757e-14	1.69772e-12
hsa-miR-181a-5p	0.699986	1.05152e-13	2.86915e-12
hsa-miR-30b-5p	0.656252	4.60885e-13	1.17372e-11
hsa-miR-153-5p	1.93085	3.34374e-12	7.60878e-11
hsa-miR-664a-5p	0.686608	3.3861e-12	7.60878e-11
hsa-miR-138-5p	1.89888	5.81069e-12	1.23316e-10
hsa-miR-548b-3p	0.592629	3.58673e-11	7.21121e-10
hsa-miR-99a-5p	0.716466	1.07014e-10	2.04397e-09
hsa-miR-421	1.50782	1.84296e-10	3.35243e-09
hsa-miR-550a-5p	1.51178	3.60207e-10	5.98257e-09
hsa-miR-582-5p	1.67385	3.50276e-10	5.98257e-09
hsa-miR-30c-5p	0.742811	5.24698e-10	8.35145e-09
hsa-miR-128-3p	1.30946	7.67096e-10	1.17212e-08
hsa-miR-675-3p	2.12723	1.06629e-09	1.50861e-08
hsa-miR-101-3p	0.76297	1.04682e-09	1.50861e-08
hsa-miR-18a-5p	1.46808	1.33259e-09	1.81803e-08
hsa-miR-432-5p	0.557537	1.50612e-09	1.98392e-08
hsa-miR-942-5p	1.37275	3.76864e-09	4.79873e-08
hsa-miR-29b-2-5p	0.721445	1.01611e-08	1.22791e-07
hsa-miR-130b-3p	1.43019	1.05824e-08	1.22791e-07
hsa-let-7c-5p	0.715033	1.06076e-08	1.22791e-07
hsa-miR-3677-3p	1.50125	2.63573e-08	2.96132e-07
hsa-miR-193b-5p	1.45974	3.01424e-08	3.28982e-07
hsa-miR-362-5p	0.689905	4.32628e-08	4.59066e-07
hsa-miR-195-5p	0.749954	5.8959e-08	6.08712e-07
hsa-miR-629-5p	1.29473	8.9856e-08	9.03289e-07
hsa-miR-181b-5p	0.775372	1.1725e-07	1.14845e-06
hsa-miR-106b-3p	1.33901	1.37339e-07	1.31159e-06
hsa-miR-9-5p	1.82528	1.78179e-07	1.66011e-06
hsa-miR-766-3p	1.29549	2.03325e-07	1.84929e-06
hsa-miR-1306-5p	1.32641	3.55591e-07	3.15897e-06
hsa-miR-135b-5p	0.670364	4.25849e-07	3.69714e-06
hsa-miR-30b-3p	0.725189	5.22663e-07	4.43682e-06
hsa-miR-146b-5p	0.735889	5.47234e-07	4.54442e-06
hsa-miR-1307-3p	1.28428	6.02481e-07	4.89676e-06
hsa-miR-320b	1.3329	7.61301e-07	6.05869e-06
hsa-miR-101-5p	0.787804	7.87485e-07	6.13917e-06
hsa-miR-193b-3p	1.43063	1.11965e-06	8.55416e-06
hsa-miR-26a-5p	0.816099	1.15038e-06	8.6166e-06
hsa-miR-181a-3p	0.80539	1.22298e-06	8.98422e-06
hsa-miR-497-5p	0.812383	1.74853e-06	1.26026e-05
hsa-miR-30e-5p	0.829395	2.04751e-06	1.44842e-05
hsa-miR-139-5p	0.738194	2.34895e-06	1.63145e-05
hsa-miR-30e-3p	0.824591	2.46674e-06	1.68267e-05
hsa-miR-146b-3p	0.770233	3.01681e-06	2.02179e-05
hsa-miR-629-3p	1.37245	4.09777e-06	2.69888e-05
hsa-miR-362-3p	0.755937	5.02732e-06	3.25498e-05
hsa-miR-151b	0.768452	5.12278e-06	3.2615e-05
hsa-miR-29c-5p	0.791555	5.32172e-06	3.33262e-05
hsa-miR-125a-5p	0.827743	5.54635e-06	3.41726e-05
hsa-miR-3065-3p	0.665082	6.90191e-06	4.18496e-05
hsa-miR-660-5p	0.788445	7.88049e-06	4.70367e-05
hsa-miR-2355-5p	1.26986	8.3287e-06	4.89471e-05
hsa-miR-205-5p	1.75396	9.15349e-06	5.29793e-05
hsa-miR-2355-3p	1.29893	9.39356e-06	5.35573e-05
hsa-miR-23a-3p	1.15174	9.86623e-06	5.50204e-05
hsa-miR-338-3p	0.684579	9.93825e-06	5.50204e-05
hsa-miR-106b-5p	1.21035	1.00916e-05	5.50712e-05
hsa-miR-1301-3p	1.28298	1.11307e-05	5.98863e-05
hsa-miR-223-3p	1.33748	1.17352e-05	6.22618e-05
hsa-miR-365b-3p	1.27901	1.39553e-05	7.30265e-05
hsa-miR-365a-3p	1.27872	1.42617e-05	7.35498e-05
hsa-miR-576-5p	1.24635	1.44404e-05	7.35498e-05
hsa-miR-193a-5p	1.2485	1.80646e-05	9.07984e-05
hsa-miR-4772-3p	1.31301	1.88355e-05	9.34438e-05
hsa-miR-4661-5p	1.36729	2.01265e-05	9.73204e-05
hsa-miR-769-5p	1.19648	1.9919e-05	9.73204e-05
hsa-miR-34a-5p	0.823695	2.12088e-05	0.000101272
hsa-miR-148a-5p	0.770907	2.49997e-05	0.0001179
hsa-miR-20b-5p	1.51053	2.61645e-05	0.000121888
hsa-miR-1266-5p	1.33025	2.97741e-05	0.000137033
hsa-miR-195-3p	0.811344	3.03608e-05	0.000138069
hsa-miR-95-3p	1.39014	4.3536e-05	0.000195656
hsa-miR-493-5p	0.706968	4.47876e-05	0.00019894
hsa-miR-187-3p	0.649543	5.35115e-05	0.000234958
hsa-miR-222-5p	1.30059	6.65902e-05	0.000289062
hsa-miR-203a-3p	1.38681	7.3339e-05	0.000314781
hsa-miR-431-3p	0.675185	7.49033e-05	0.000317923
hsa-miR-29a-3p	0.824383	7.61073e-05	0.000319484
hsa-miR-27b-3p	0.845534	8.40577e-05	0.000349022
hsa-miR-331-5p	1.17642	8.51875e-05	0.00034991
hsa-miR-185-3p	1.24311	9.59134e-05	0.000389776
hsa-miR-193a-3p	1.23379	9.87854e-05	0.000397221
hsa-miR-1296-5p	1.24067	0.000118716	0.00047239
hsa-miR-495-3p	0.692649	0.000126399	0.000497776
hsa-miR-532-5p	0.83495	0.000165996	0.000647044
hsa-miR-125b-2-3p	0.794079	0.000202902	0.000782914
hsa-miR-146a-5p	0.792116	0.000238011	0.0009092
hsa-miR-130b-5p	1.24769	0.000261336	0.000988418
hsa-miR-29c-3p	0.813081	0.000284017	0.00106367
hsa-miR-27a-3p	1.15675	0.000317855	0.00117884
hsa-miR-550a-3p	1.25906	0.000332861	0.00122262
hsa-miR-15b-3p	1.18776	0.000359451	0.00130772
hsa-miR-502-3p	0.853514	0.000380502	0.00137124
hsa-miR-328-3p	0.832951	0.000392465	0.00140114
hsa-miR-330-5p	1.20176	0.000403152	0.00142596
hsa-miR-4662a-5p	1.30748	0.000479796	0.00168149
hsa-miR-200a-5p	1.23527	0.000491115	0.00169354
hsa-miR-625-3p	1.2033	0.000492102	0.00169354
hsa-miR-26a-2-3p	0.827239	0.000505879	0.00172541
hsa-miR-218-5p	0.839565	0.000512372	0.00173209
hsa-miR-128-1-5p	1.18667	0.000522612	0.00175121
hsa-miR-487b-3p	0.717132	0.000534261	0.00177468
hsa-miR-148a-3p	0.831989	0.000566597	0.00186586
hsa-let-7a-2-3p	1.34277	0.000580819	0.00189635
hsa-miR-133a-3p	0.744533	0.000600639	0.00194444
hsa-miR-197-3p	1.1509	0.000627964	0.00201582
hsa-miR-93-3p	1.18511	0.000655703	0.00207013
hsa-miR-874-3p	1.17928	0.000655721	0.00207013
hsa-miR-132-3p	1.15963	0.000699927	0.00219158
hsa-miR-182-5p	0.825006	0.000815849	0.00253378
hsa-miR-3934-3p	0.81007	0.000880033	0.002699
hsa-miR-224-3p	0.761134	0.00088318	0.002699
hsa-miR-708-5p	1.25296	0.000898039	0.00272263
hsa-miR-25-3p	1.1488	0.000972321	0.00292462
hsa-miR-21-3p	1.17955	0.0010771	0.00321042
hsa-miR-15a-5p	0.878944	0.00108415	0.00321042
hsa-miR-642a-5p	1.25493	0.00113271	0.00332844
hsa-miR-339-3p	0.86281	0.00118111	0.00344414
hsa-miR-1-3p	0.754951	0.00125769	0.00363967
hsa-miR-1180-3p	1.22512	0.0012901	0.00370539
hsa-miR-425-5p	1.1723	0.00156306	0.00445588
hsa-miR-877-5p	1.24612	0.00161787	0.0045443
hsa-miR-221-3p	1.20272	0.00161563	0.0045443
hsa-miR-23b-3p	0.883975	0.0017409	0.0048542
hsa-miR-363-3p	1.31677	0.00184821	0.00511605
hsa-miR-24-2-5p	1.16211	0.00202258	0.00555847
hsa-miR-493-3p	0.760843	0.0020764	0.0056656
hsa-miR-22-3p	1.10051	0.00228389	0.00618756
hsa-miR-222-3p	1.18316	0.00261052	0.00697754
hsa-miR-99b-3p	1.17626	0.00261787	0.00697754
hsa-miR-500b-5p	0.842308	0.00264854	0.00697754
hsa-miR-542-3p	0.824838	0.00263067	0.00697754
hsa-miR-212-3p	1.22141	0.00271605	0.00701035
hsa-miR-136-5p	0.772609	0.00270972	0.00701035
hsa-miR-758-5p	0.750225	0.00270253	0.00701035
hsa-miR-500a-5p	0.842933	0.00276123	0.00707914
hsa-miR-93-5p	1.16637	0.00285575	0.00727265
hsa-miR-339-5p	0.855298	0.00293503	0.00742505
hsa-miR-500a-3p	0.856068	0.00307289	0.00772267
hsa-miR-532-3p	0.855569	0.0032588	0.00813635
hsa-miR-509-3p	0.702504	0.00336348	0.00834318
hsa-miR-1976	0.882709	0.00347907	0.00857421
hsa-miR-590-5p	1.15406	0.00374112	0.00916094
hsa-miR-200c-5p	1.18036	0.00382768	0.00931322
hsa-miR-3065-5p	0.77528	0.00400451	0.0096818
hsa-miR-577	1.38446	0.00403105	0.00968466
hsa-miR-1247-3p	1.32683	0.00425892	0.0101682
hsa-miR-151a-5p	0.894375	0.00446008	0.0105823
hsa-miR-1287-5p	0.85574	0.00474868	0.0111975
hsa-miR-132-5p	1.14791	0.00645113	0.0151186
hsa-miR-1287-3p	0.825995	0.00666255	0.0155189
hsa-miR-217	0.801614	0.00685685	0.0158747
hsa-miR-106a-5p	1.23624	0.0069177	0.015919
hsa-miR-29b-3p	0.866962	0.00777637	0.0177879
hsa-miR-17-5p	1.15177	0.00789055	0.0179416
hsa-miR-508-3p	0.742282	0.00832216	0.018811
hsa-let-7c-3p	0.824415	0.00844906	0.0189855
hsa-miR-514a-3p	0.72756	0.00969849	0.0216656
hsa-miR-455-5p	0.877388	0.00978865	0.0217399
hsa-miR-22-5p	1.13601	0.0102587	0.0226521
hsa-miR-590-3p	1.14922	0.0108351	0.0237874
hsa-miR-3074-5p	1.18185	0.0109498	0.0239018
hsa-miR-181a-2-3p	0.8908	0.0110698	0.0240266
hsa-miR-141-5p	1.16035	0.0113511	0.0244979
hsa-miR-708-3p	1.16861	0.0114503	0.0245731
hsa-miR-29a-5p	0.872629	0.0115601	0.0246701
hsa-miR-410-3p	0.784506	0.0117961	0.025034
hsa-miR-196a-5p	1.40354	0.0128488	0.0271174
hsa-miR-625-5p	1.15461	0.0139269	0.0292313
hsa-miR-24-1-5p	0.879823	0.0142665	0.0297803
hsa-miR-331-3p	1.13325	0.0148937	0.0309206
hsa-miR-4326	1.26204	0.0152029	0.0313918
hsa-miR-149-5p	1.23094	0.0157048	0.032254
hsa-miR-1307-5p	1.17945	0.0162821	0.0332607
hsa-let-7g-5p	0.902506	0.0164237	0.0333716
hsa-miR-4677-3p	1.11443	0.0173	0.0349661
hsa-miR-125a-3p	1.134	0.0174446	0.0350727
hsa-miR-181c-5p	0.875822	0.0176047	0.0352093
hsa-miR-199b-5p	0.878813	0.0183648	0.0365382
hsa-miR-501-5p	0.86638	0.0186946	0.0370018
hsa-miR-19a-3p	1.17465	0.0209756	0.0413025
hsa-miR-152-3p	1.12097	0.0216865	0.0424833
hsa-miR-326	0.844627	0.0223991	0.0436555
hsa-miR-345-5p	1.16376	0.0231534	0.0448965
hsa-miR-100-5p	1.17869	0.0234571	0.0450282
hsa-miR-150-5p	0.860694	0.0234322	0.0450282
hsa-miR-671-5p	1.12847	0.0239655	0.0457741
Table S2B. TCGA-LUAD cohort. n = 90 miRNAs significantly regulated by BRB-Arraytools in C1 vs. non-C1 clusters comparison.
miRNA	Fold Change C1 vs. non-C1	Parametric p-value
hsa-miR-30d-5p	0.59	< 1.00E-07
hsa-miR-30b-5p	0.62	< 1.00E-07
hsa-miR-584-5p	1.79	< 1.00E-07
hsa-miR-664a-3p	0.7	< 1.00E-07
hsa-miR-192-5p	2.17	< 1.00E-07
hsa-miR-181a-5p	0.73	< 1.00E-07
hsa-miR-196b-5p	2.53	< 1.00E-07
hsa-miR-29b-2-5p	0.7	< 1.00E-07
hsa-miR-99a-5p	0.73	< 1.00E-07
hsa-miR-128-3p	1.28	< 1.00E-07
hsa-miR-101-3p	0.78	< 1.00E-07
hsa-miR-30c-5p	0.77	< 1.00E-07
hsa-miR-582-3p	1.63	1e-07
hsa-miR-194-5p	1.84	5e-07
hsa-miR-193b-3p	1.49	5e-07
hsa-miR-30e-5p	0.82	7e-07
hsa-let-7c-5p	0.73	8e-07
hsa-miR-181b-5p	0.78	1.2e-06
hsa-miR-193a-5p	1.31	1.3e-06
hsa-miR-3065-3p	0.6	1.4e-06
hsa-miR-629-5p	1.25	3.7e-06
hsa-miR-135b-5p	0.63	4.4e-06
hsa-miR-9-5p	1.93	7.4e-06
hsa-miR-106b-3p	1.3	8.6e-06
hsa-miR-26a-5p	0.83	9.8e-06
hsa-miR-497-5p	0.81	1.03e-05
hsa-miR-29c-5p	0.79	1.2e-05
hsa-miR-2355-5p	1.27	1.26e-05
hsa-miR-34a-5p	0.81	3.06e-05
hsa-miR-125a-5p	0.84	3.82e-05
hsa-miR-210-3p	1.52	4.06e-05
hsa-miR-1307-3p	1.26	4.47e-05
hsa-miR-375	0.62	4.53e-05
hsa-miR-29a-3p	0.81	5.19e-05
hsa-miR-146b-3p	0.79	5.72e-05
hsa-miR-195-5p	0.8	6.41e-05
hsa-miR-181a-3p	0.83	6.53e-05
hsa-miR-365b-3p	1.25	0.0001051
hsa-miR-27b-3p	0.84	0.0001065
hsa-miR-365a-3p	1.25	0.000107
hsa-miR-1301-3p	1.24	0.0001829
hsa-miR-23a-3p	1.13	0.0001931
hsa-miR-660-5p	0.81	0.0001937
hsa-miR-769-5p	1.16	0.0002519
hsa-miR-1976	0.84	0.0002675
hsa-miR-590-5p	1.21	0.0002722
hsa-miR-21-3p	1.21	0.0002734
hsa-miR-146b-5p	0.79	0.0002906
hsa-miR-30e-3p	0.86	0.0002928
hsa-miR-328-3p	0.83	0.0003631
hsa-miR-223-3p	1.28	0.0003695
hsa-miR-197-3p	1.16	0.0004184
hsa-miR-130b-3p	1.24	0.0004304
hsa-miR-29c-3p	0.81	0.0006428
hsa-miR-106b-5p	1.15	0.0009178
hsa-miR-24-2-5p	1.18	0.0012071
hsa-miR-15b-3p	1.17	0.0012454
hsa-miR-23b-3p	0.88	0.0013652
hsa-miR-27a-3p	1.14	0.0014078
hsa-miR-187-3p	0.64	0.0014219
hsa-miR-532-5p	0.86	0.0015716
hsa-miR-148a-3p	0.83	0.0017357
hsa-miR-218-5p	0.84	0.0018392
hsa-miR-132-3p	1.15	0.0020484
hsa-miR-182-5p	0.83	0.0021541
hsa-miR-708-5p	1.26	0.0021842
hsa-miR-542-3p	0.81	0.0021863
hsa-miR-29b-3p	0.84	0.0023037
hsa-miR-148a-5p	0.81	0.0024801
hsa-miR-134-5p	1.33	0.0025445
hsa-miR-425-5p	1.17	0.0027268
hsa-miR-139-5p	0.82	0.0030118
hsa-miR-339-3p	0.87	0.0031698
hsa-miR-22-5p	1.17	0.0035286
hsa-miR-339-5p	0.85	0.0038658
hsa-miR-24-1-5p	0.85	0.0041538
hsa-miR-874-3p	1.17	0.0043277
hsa-miR-625-3p	1.17	0.0045894
hsa-miR-326	0.79	0.0047114
hsa-miR-1287-5p	0.85	0.0054648
hsa-miR-708-3p	1.21	0.0055397
hsa-miR-150-5p	0.81	0.0066565
hsa-miR-330-5p	1.16	0.0070903
hsa-miR-151a-5p	0.9	0.0088094
hsa-let-7g-5p	0.89	0.0109381
hsa-miR-200c-5p	1.17	0.0112889
hsa-miR-1266-5p	1.2	0.0115037
hsa-miR-500a-3p	0.88	0.0115122
hsa-miR-93-5p	1.14	0.0119696
hsa-miR-331-3p	1.14	0.0123324

## Sheet: Table_S3
Table S3. Distributions of expression for the 7 miRNAs (median, first-Q1 and third-Q3 quartiles are reported) in TCGA-LUAD and CSS cohorts.
	TCGA-LUAD n = 510 log2 normalized counts			CSS cohort n = 44 normalized CRT
miRNA	Median	Q1	Q3	Median	Q1	Q3	n >35
hsa-miR-193b-3p	7.69772	6.89801	8.6166	23.5835	21.9439	24.3842	0
hsa-miR-193b-5p	4.26666	3.55225	4.99584	30.4416	24.588	36.5531	12
hsa-miR-196b-5p	6.41732	5.14251	8.67283	29.1	27.9598	30.1864	1
hsa-miR-31-3p	2.93954	1.52784	4.94844	26.3964	25.1412	27.5316	0
hsa-miR-31-5p	3.6197	1.87341	5.75089	26.8765	24.2121	28.1451	0
hsa-miR-550a-5p	4.00733	3.3272	4.66659	24.8608	23.8941	25.8317	0
hsa-miR-584-5p	6.45792	5.86578	7.28828	23.0157	21.6424	24.7216	2

## Sheet: Table_S4
Table S4. Logistic model regression coefficients for the 7 miRNAs, for all stages and stage I tumors of CSS cohort.
Parameter	Estimate - ALL STAGES	Estimate - STAGE I
Intercept	2.292	11.435
hsa-miR-193b-3p	0.1295	0.3266
hsa-miR-193b-5p	0.092	0.00677
hsa-miR-196b-5p	-0.131	-0.4316
hsa-miR-31-3p	-0.2116	-0.00347
hsa-miR-31-5p	-0.2724	-0.544
hsa-miR-550a-5p	0.2717	0.0295
hsa-miR-584-5p	0.0413	0.2387

## Sheet: Table_S5
Table S5. TaqMan assays used to amplify miRNA of the 7-miRNA signature, the “standard reference” miR-16-5p is also reported.
Assay	ID	Signature
478314_mir	hsa-miR-193b-3p	7-miRNA
478742_mir	hsa-miR-193b-5p	7-miRNA
478585_mir	hsa-miR-196b-5p	7-miRNA
478012_mir	hsa-miR-31-3p	7-miRNA
478015_mir	hsa-miR-31-5p	7-miRNA
477852_mir	hsa-miR-550a-5p	7-miRNA
478167_mir	hsa-miR-584-5p	7-miRNA
477860_mir	hsa-miR-16-5p	standard reference miRNA

## Sheet: Table_S6
Table S6. Expression profile of miR-16-5p in the CSS and TCGA-LUAD cohorts (median, first-Q1 and third-Q3 quartiles are reported).
	n	Median	Q1	Q3	Wilcoxon test p-value
CSS cohort n = 44 (CT)
C1	16	21.63	20.76	22.38	0.6
non-C1	28	21.38	20.15	22.62
TCGA-LUAD cohort n = 510 (log2 normalized reads)
C1	199	11.03	10.69	11.43	0.29
non-C1	311	11.06	10.76	11.46
